# Supplementary material for: Human iPSC-derived neural stem cells engraft and improve pathophysiology of MPS I mice
Source: PubMed Central journal article supplement — Mol Ther Methods Clin Dev. 2024 Nov 5;32(4):101367. doi: 10.1016/j.omtm.2024.101367 (PMC11701249; doi:10.1016/j.omtm.2024.101367), 2024-11-05
Supplement: mmc1.pdf [file mmc1.pdf]

**OMTM, Volume 32**

**Supplemental information**

**Human iPSC-derived neural stem cells engraft  
and improve pathophysiology of MPS I mice**

**Caitlin C. Calhoun, Shih-Hsin Kan, Alexander E. Stover, Jerry F. Harb, Edwin S. Monuki, Raymond Y. Wang, and Philip H. Schwartz**

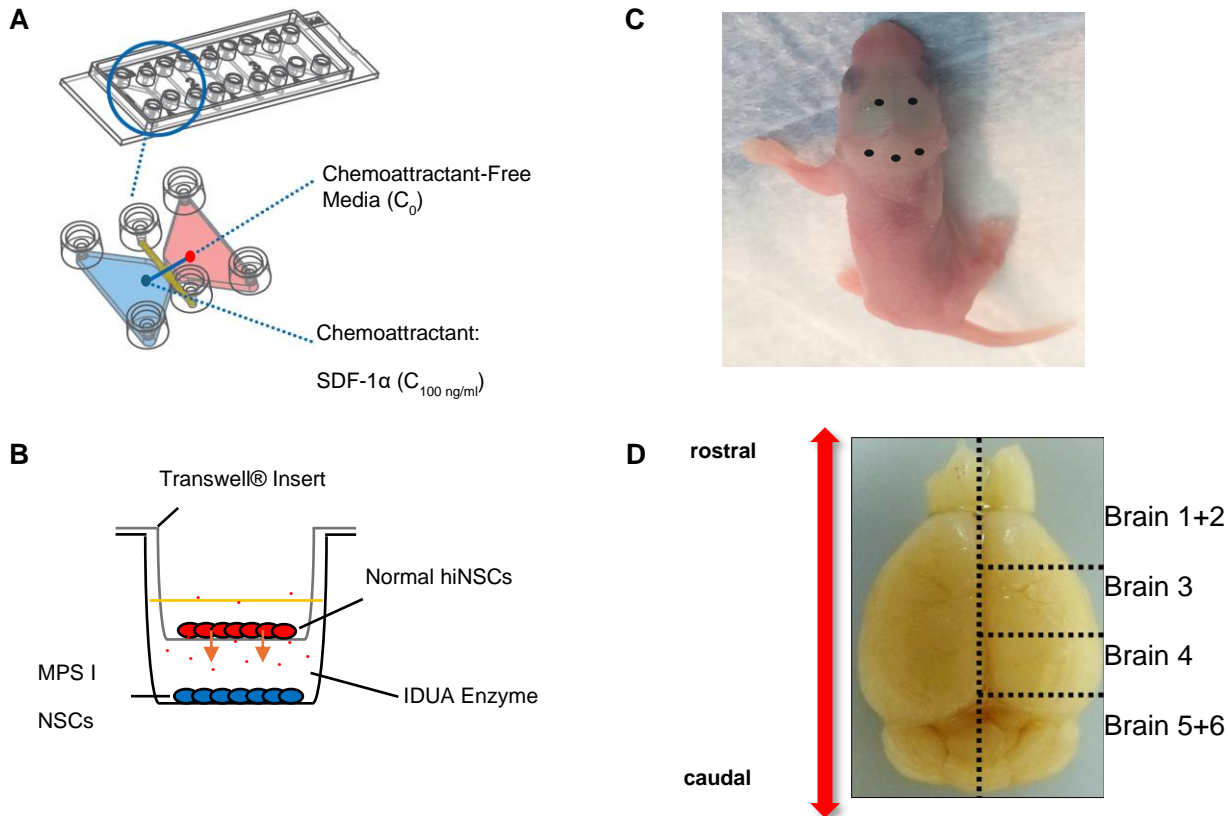

Figure S1:

**A.** ibidi  $\mu$ -Slide Chemotaxis assay set-up used to measure qualitative migration. HiNSCs were seeded in the center observation chamber (yellow); chemoattractant SDF-1 $\alpha$  on the left side of reservoir chamber (blue); chemoattractant-free media on the right side of the reservoir chamber (pink). Image was authorized for use with minor modifications from ibidi GmbH.

**B.** Transwell $\text{\textcircled{R}}$  co-culture setup used to measure cross-correction efficacy. MPS I-NSCs (GM00415) at the bottom of the well (blue); hiNSCs in the Transwell $\text{\textcircled{R}}$  insert on top (red).

**C.** Immunodeficient MPS I knockout (*Idua*<sup>-/-</sup>) mice aged 1-2 days received hiNSCs via bilateral injections into both lateral ventricles and intraparenchymally at three sites in the cerebellum ( $1 \times 10^5$  hiNSCs per site).

**D.** Top view of an adult mouse brain from an engrafted animal at 8 months post-transplantation. Mouse brain was dissected sagittally along the midline. The right hemispheres were coronally sectioned at 2 mm thickness and fractionated for biochemical analysis. Left hemispheres were fixed in 4% PFA for histological examination.

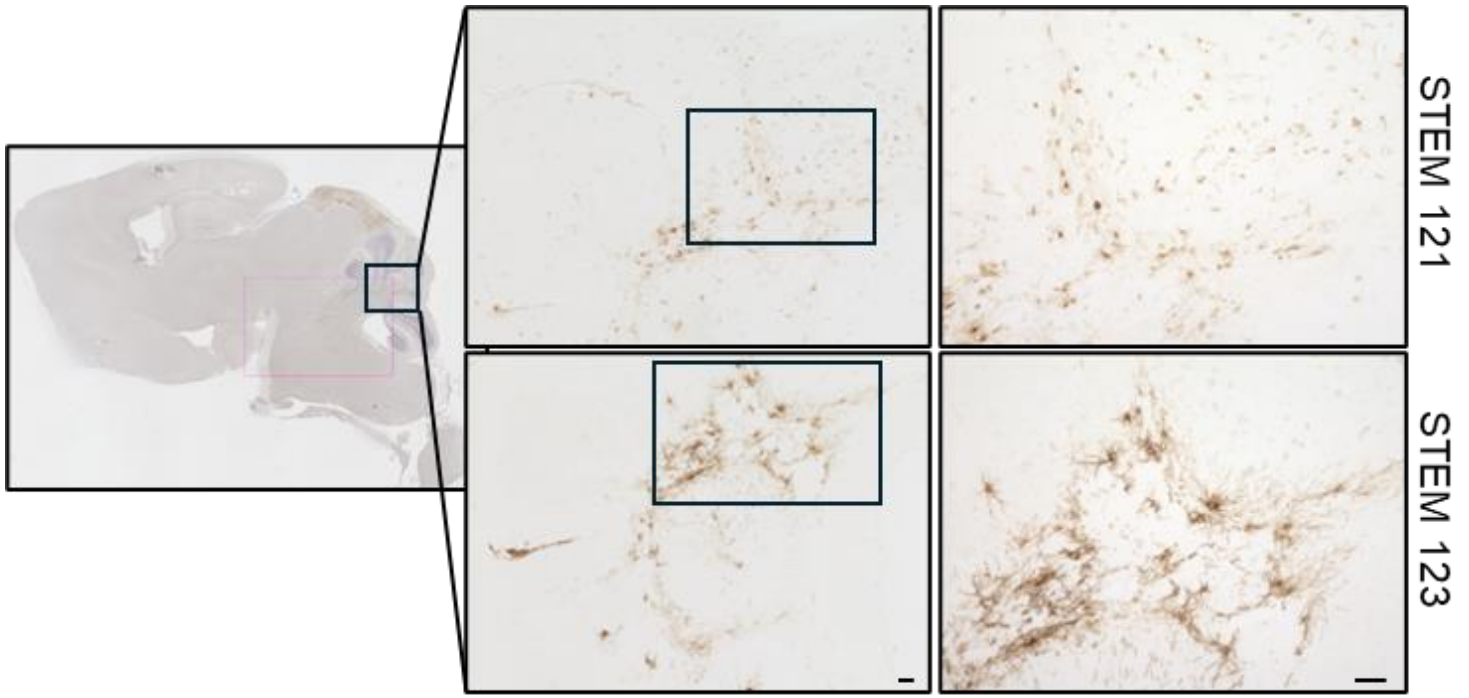

Figure S2:

Representative images show immunohistochemical staining for STEM121 and STEM 123 in the cerebellum area. To determine the differentiation status of hiNSCs after 8 months engraftment in the *Idua*<sup>-/-</sup> mouse brain, sections were stained with STEM123, a marker specific to human glial fibrillary acidic protein (GFAP). Scale bars, 50  $\mu$ m

Video S1:

Description: Time-lapse video of hiNSCs (center) migrating towards the chemoattractant SDF-1 $\alpha$  (left) in an ibidi  $\mu$ -slide chemotaxis assay, with no chemoattractant present in the right reservoir.
